# Supplementary material for: PGPB Bacillus Megaterium AFI1 and Paenibacillus Nicotianae AFI2 Improve Nutrient Uptake and Stimulate Adaptation of Wheat Under Nickel Exposure
Source: MDPI journal article supplement (doi:10.3390/ijms27115041), 2026-06-02
Supplement: s1 [file ijms-4318151-supplementary.pdf › ijms-4318151-supplementary.pdf]

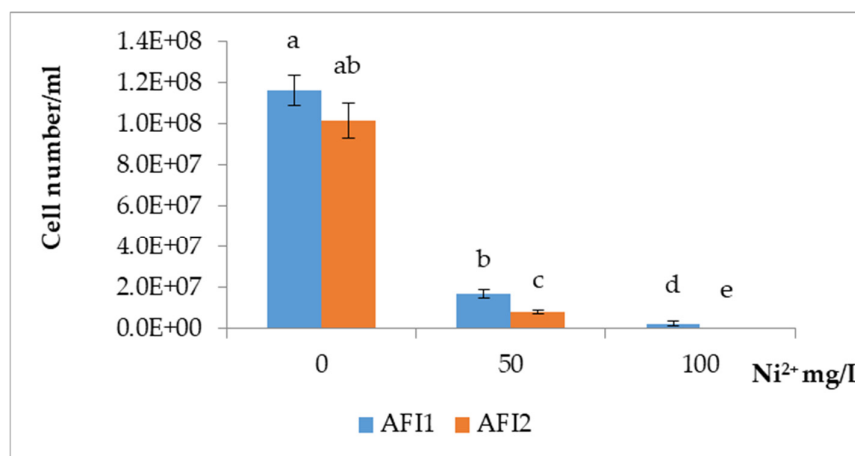

**Figure S1.** Growth of PGPB studied on LB medium with different concentrations of Ni<sup>2+</sup>. Notes: different letters (a–e) are significantly different at the  $p \leq 0.05$ , as determined by Duncan's multiple range test. AFI1: *Bacillus megaterium* AFI1, AFI2: *Paenibacillus nicotianae* AFI2.

**Table S1.** The effect of Ni and PGPB *Bacillus megaterium* AFI1 and *Paenibacillus nicotianae*. AFI2 on the area of flag leaf of wheat cv. Leningradsкая 6.

| Variant      | Flag leaf length, cm   | Flag leaf width, cm     | Flag leaf area, cm <sup>2</sup> |
|--------------|------------------------|-------------------------|---------------------------------|
| Control      | 19.6±1.5 <sup>bc</sup> | 0.68±0.03 <sup>b</sup>  | 8.9±0.4 <sup>b</sup>            |
| AFI1         | 22.1±1.3 <sup>ab</sup> | 0.76±0.04 <sup>a</sup>  | 11.2±0.4 <sup>a</sup>           |
| AFI2         | 22.6±1.1 <sup>a</sup>  | 0.81±0.07 <sup>a</sup>  | 12.2±0.7 <sup>a</sup>           |
| AFI1+AFI2    | 22.7±1.4 <sup>a</sup>  | 0.77±0.05 <sup>a</sup>  | 11.7±0.5 <sup>a</sup>           |
| Ni           | 17.9±1.3 <sup>c</sup>  | 0.61±0.03 <sup>c</sup>  | 7.3±0.4 <sup>c</sup>            |
| Ni+AFI1      | 20.0±0.9 <sup>bc</sup> | 0.68±0.04 <sup>b</sup>  | 9.1±0.4 <sup>b</sup>            |
| Ni+AFI2      | 20.7±1.4 <sup>ab</sup> | 0.62±0.03 <sup>bc</sup> | 8.6±0.6 <sup>b</sup>            |
| Ni+AFI1+AFI2 | 20.3±1.1 <sup>ab</sup> | 0.67±0.05 <sup>b</sup>  | 9.1±0.5 <sup>b</sup>            |

Notes: Control: non-inoculated wheat plants. Ni: the addition of 100 mg/kg Ni<sup>2+</sup>. AFI1 and AFI2: wheat plants inoculated with appropriate strains *Bacillus megaterium* AFI1 and *Paenibacillus nicotianae* AFI2. Bars show ±SEM. Values in columns followed by different letters (a–c) are significantly different at the  $p \leq 0.05$ , as determined by Duncan's multiple range test.

**Table S2.** The coefficients of Ni biological accumulation (CBA) and Ni translocation (CT) in wheat grains.

| Variant                    | Ni                       | Ni+AFI1                   | Ni+AFI2                  | Ni+AFI1+AFI2             |
|----------------------------|--------------------------|---------------------------|--------------------------|--------------------------|
| CBA, 1 <sup>st</sup> year  | 0.166±0.009 <sup>a</sup> | 0.111±0.006 <sup>c</sup>  | 0.129±0.007 <sup>b</sup> | 0.127±0.007 <sup>b</sup> |
| CBA2, 2 <sup>nd</sup> year | 0.180±0.010 <sup>a</sup> | 0.121±0.007 <sup>c</sup>  | 0.139±0.008 <sup>b</sup> | 0.135±0.008 <sup>b</sup> |
| CBA average                | 0.173±0.009 <sup>a</sup> | 0.116±0.006 <sup>c</sup>  | 0.134±0.006 <sup>b</sup> | 0.131±0.006 <sup>b</sup> |
| CT, 1 <sup>st</sup> year   | 0.098±0.006 <sup>a</sup> | 0.073±0.004 <sup>c</sup>  | 0.083±0.005 <sup>b</sup> | 0.083±0.005 <sup>b</sup> |
| CT 2 <sup>nd</sup> year    | 0.101±0.006 <sup>a</sup> | 0.075±0.004 <sup>bc</sup> | 0.084±0.005 <sup>b</sup> | 0.084±0.005 <sup>b</sup> |
| CBA average                | 0.099±0.004 <sup>a</sup> | 0.074±0.003 <sup>c</sup>  | 0.084±0.003 <sup>b</sup> | 0.083±0.003 <sup>b</sup> |

Notes: Ni: non-inoculated wheat plants, growing under Ni stress (100 mg Ni<sup>2+</sup> per 1 kg of soil). AFI1 and AFI2: wheat plants inoculated with appropriate strains *Bacillus megaterium* AFI1 and *Paenibacillus nicotianae* AFI2. CBA= Ni concentration in the grains/Ni concentration in the soil, CT= Ni concentration in the grains/Ni concentration in the roots. Bars with different letters in the rows are significantly different at  $p \leq 0.05$ , as determined by Duncan's multiple range test. Wheat plants cv. Leningradsкая 6 were grown under controlled conditions during two vegetation experiments (80 days).

**Table S3.** Coefficients of Ni biological accumulation and Ni translocation in wheat straw.

| Variant                    | Ni                       | Ni+AFI1                   | Ni+AFI2                   | Ni+AFI1+AFI2              |
|----------------------------|--------------------------|---------------------------|---------------------------|---------------------------|
| CBA, 1 <sup>st</sup> year  | 0.131±0.007 <sup>a</sup> | 0.104±0.006 <sup>b</sup>  | 0.118±0.007 <sup>ab</sup> | 0.111±0.006 <sup>b</sup>  |
| CBA2, 2 <sup>nd</sup> year | 0.166±0.009 <sup>a</sup> | 0.123±0.007 <sup>c</sup>  | 0.145±0.008 <sup>b</sup>  | 0.146±0.008 <sup>b</sup>  |
| CBA average                | 0.149±0.016 <sup>a</sup> | 0.113±0.009 <sup>b</sup>  | 0.131±0.013 <sup>ab</sup> | 0.128±0.016 <sup>ab</sup> |
| CT, 1 <sup>st</sup> year   | 0.077±0.004 <sup>a</sup> | 0.069±0.004 <sup>ab</sup> | 0.076±0.004 <sup>a</sup>  | 0.072±0.004 <sup>ab</sup> |
| CT 2 <sup>nd</sup> year    | 0.093±0.005 <sup>a</sup> | 0.077±0.004 <sup>b</sup>  | 0.088±0.005 <sup>ab</sup> | 0.090±0.005 <sup>a</sup>  |
| CBA average                | 0.085±0.008 <sup>a</sup> | 0.073±0.004 <sup>ab</sup> | 0.082±0.006 <sup>a</sup>  | 0.081±0.008 <sup>ab</sup> |

Notes: Ni: non-inoculated wheat plants, growing under Ni stress (100 mg Ni<sup>2+</sup> per 1 kg of soil). AFI1 and AFI2: wheat plants inoculated with appropriate strains *Bacillus megaterium* AFI1 and *Paenibacillus nicotianae* AFI2. CBA - Ni concentration in the straw/Ni concentration in the soil, CT - Ni concentration in the straw/Ni concentration in the roots. Bars with different letters in the rows are significantly different at  $p \leq 0.05$ , as determined by Duncan's multiple range test. Wheat plants cv. Leningradsкая 6 were grown under controlled conditions during two vegetation experiments (80 days).

**Table S4.** Effect of PGPB on the content of mobile fractions of elements in the soil at the end of the experiment.

| Variant      | pH <sub>KCl</sub>    | P <sub>2</sub> O <sub>5</sub> , mg/kg | K <sub>2</sub> O, mg/kg | N-NO <sub>3</sub> , mg/kg | N-NH <sub>4</sub> , mg/kg | Ni, mg/kg              |
|--------------|----------------------|---------------------------------------|-------------------------|---------------------------|---------------------------|------------------------|
| Control      | 6.2±0.1 <sup>a</sup> | 190.60±15.1 <sup>c</sup>              | 65.90±5.2 <sup>bc</sup> | 26.30±2.1 <sup>d</sup>    | 7.58±0.6 <sup>c</sup>     | 0.8±0.1 <sup>c</sup>   |
| Ni           | 5.8±0.2 <sup>a</sup> | 214.30±17.0 <sup>b</sup>              | 90.90±7.2 <sup>a</sup>  | 51.30±4.1 <sup>b</sup>    | 10.07±0.8 <sup>a</sup>    | 93.81±7.4 <sup>a</sup> |
| Ni + AFI1    | 5.8±0.1 <sup>a</sup> | 249.30±19.8 <sup>a</sup>              | 75.50±6.0 <sup>b</sup>  | 61.70±4.9 <sup>a</sup>    | 10.29±0.8 <sup>a</sup>    | 77.26±6.1 <sup>b</sup> |
| Ni + AFI2    | 5.8±0.2 <sup>a</sup> | 204.40±16.2 <sup>bc</sup>             | 59.90±4.7 <sup>c</sup>  | 45.70±3.6 <sup>c</sup>    | 9.50±0.8 <sup>ab</sup>    | 83.43±6.6 <sup>b</sup> |
| Ni+AFI1+AFI2 | 5.8±0.2 <sup>a</sup> | 213.10±16.9 <sup>b</sup>              | 71.10±5.6 <sup>bc</sup> | 47.70±3.8 <sup>bc</sup>   | 8.58±0.7 <sup>b</sup>     | 80.50±6.4 <sup>b</sup> |

Notes: Ni: non-inoculated wheat plants, growing under Ni stress (100 mg Ni<sup>2+</sup> per 1 kg of soil). AFI1 and AFI2: wheat plants inoculated with appropriate strains *Bacillus megaterium* AFI1 and *Paenibacillus nicotianae* AFI2. Bars with different letters are significantly different at  $p \leq 0.05$ , as determined by Duncan's multiple range test.

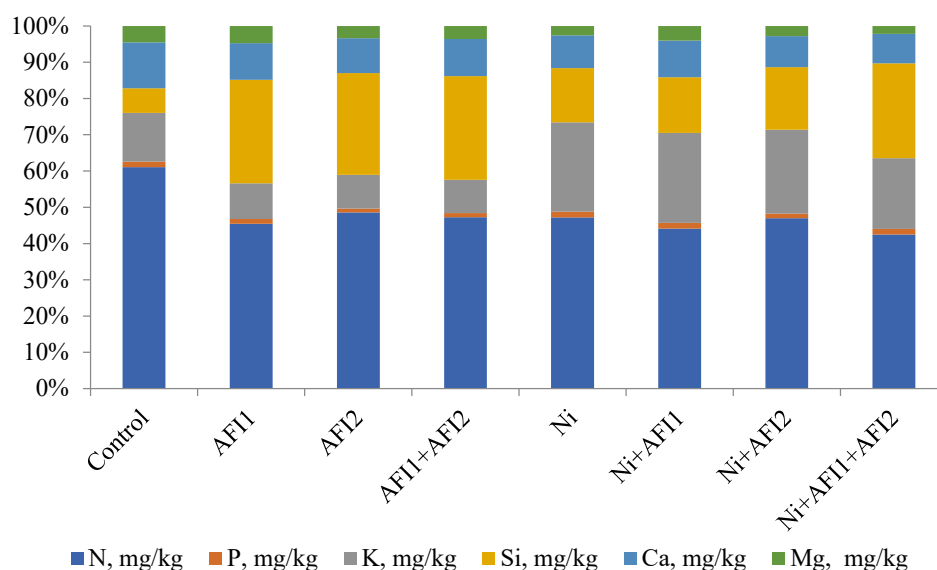**Figure S2.** The effect of PGPB on relative content of macronutrients and silicon in wheat roots. Notes: **Control**: non-inoculated wheat cv. Leningradsкая 6. **Ni**: the addition of 100 mg/kg Ni<sup>2+</sup>. **AFI1** and **AFI2**: wheat plants inoculated with appropriate strains *Bacillus megaterium* AFI1 and *Paenibacillus nicotianae* AFI2.

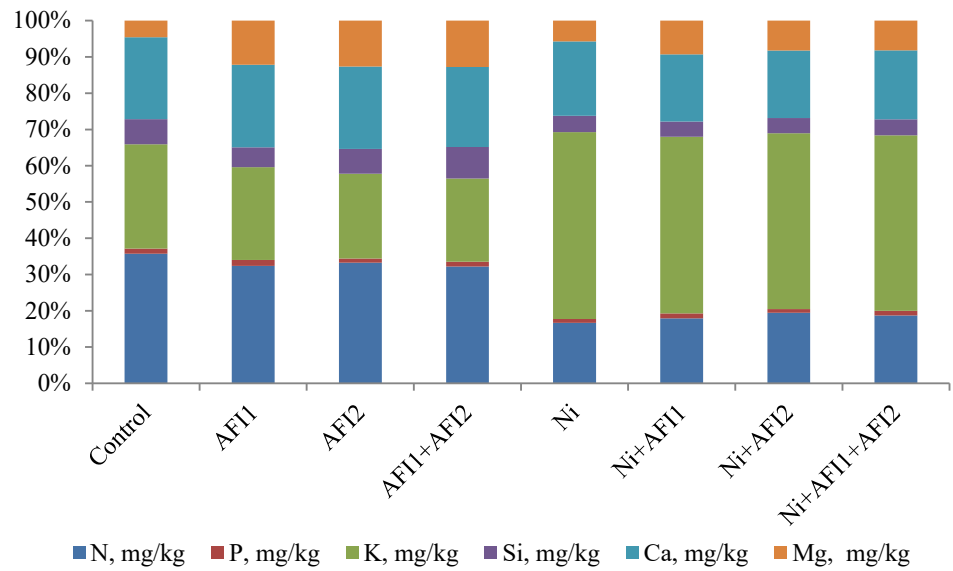

**Figure S3.** The effect of PGPB on relative content of macronutrients and silicon in wheat straw. Notes: Control: non-inoculated wheat cv. Leningradskaya 6. Ni: the addition of 100 mg/kg Ni<sup>2+</sup>. AFI1 and AFI2: wheat plants inoculated with appropriate strains *Bacillus megaterium* AFI1 and *Pae-nibacillus nicotinae* AFI2.

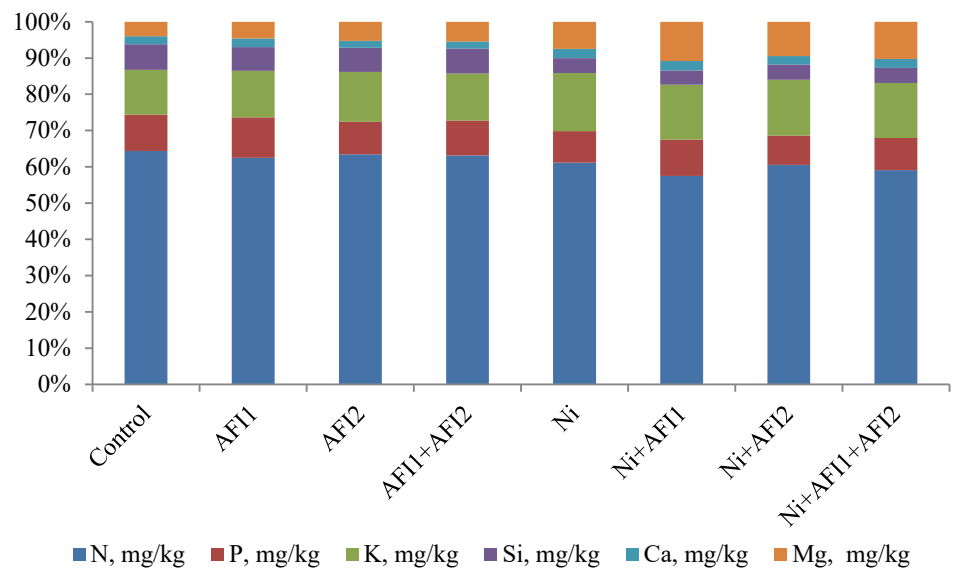

**Figure S4.** The effect of PGPB on relative content of macronutrients and silicon in wheat grains. Notes: Control: non-inoculated wheat cv. Leningradskaya 6. Ni: the addition of 100 mg/kg Ni<sup>2+</sup>. AFI1 and AFI2: wheat plants inoculated with appropriate strains *Bacillus megaterium* AFI1 and *Pae-nibacillus nicotinae* AFI2.
